# Supplementary material for: Network Protein Interaction in Parkinson's Disease and Periodontitis Interplay: A Bioinformatic Analysis
Source: Preprints.org preprint supplement (doi:10.20944/preprints202009.0050.v1), 2020-09-03
Supplement: Supplementary file 1 [file supplementary]

Appendix S1. Genes and their corresponding proteins for Periodontitis

| **Mapped gene** | **Reported trait** |
| --- | --- |
| GLT6D1 | Periodontitis |
| AL360006.1, KCNK1 | Periodontal microbiota |
| PKN2-AS1 | Periodontal microbiota |
| CLIC5, RUNX2 | Periodontal microbiota |
| Y_RNA, AC064802.1 | Periodontal microbiota |
| CAMTA1 | Periodontal microbiota |
| AF111167.2, LINC01220 | Periodontal microbiota |
| TENM2 | Periodontal microbiota |
| GRID1 | Periodontal microbiota |
| AL360006.1, KCNK1 | Periodontal microbiota |
| AC016751.2, EXTL2P1 | Periodontal microbiota |
| DAB2IP, AL596244.1 | Periodontal microbiota |
| Y_RNA, NAMPTP1 | Periodontal microbiota |
| FAM166C, OTOF | Periodontal microbiota |
| FBXO38 | Periodontal microbiota |
| UHRF2 | Periodontal microbiota |
| TBC1D1 | Periodontal microbiota |
| AC003044.1 | Periodontitis |
| AL136967.2, FOXP4-AS1 | Periodontitis |
| ADGRE1 | Periodontitis |
| TTC6 | Periodontitis (CDC/AAP) |
| GPN1 | Periodontitis (CDC/AAP) |
| HLA-DOA | Periodontitis (CDC/AAP) |
| ITGA8 | Periodontitis (CDC/AAP) |
| ERGIC1 | Periodontitis (CDC/AAP) |
| LRP1B | Periodontitis (CDC/AAP) |
| PRB2, AC078950.1 | Periodontitis (CDC/AAP) |
| C10orf91, AL451069.1 | Periodontitis (CDC/AAP) |
| AL161449.2, Y_RNA | Periodontitis (CDC/AAP) |
| CEP295NL, TIMP2 | Periodontitis (CDC/AAP) |
| ACTN2 | Periodontitis (CDC/AAP) |
| KDM4B | Periodontitis (CDC/AAP) |
| LINC01828, AC007403.1 | Periodontitis (CDC/AAP) |
| AC022239.2, LINC00208 | Periodontitis (CDC/AAP) |
| AC015987.1 | Periodontitis (CDC/AAP) |
| MFSD1 | Periodontitis (CDC/AAP) |
| LINC01262, HSP90AA4P | Periodontitis (CDC/AAP) |
| IGF2R | Periodontitis (CDC/AAP) |
| WDR73, SCAND2P | Periodontitis (CDC/AAP) |
| PARP15 | Periodontitis (CDC/AAP) |
| RPL35AP19, AC068413.1 | Periodontitis (CDC/AAP) |
| CSMD1 | Periodontitis (CDC/AAP) |
| ETNK2 | Periodontitis (CDC/AAP) |
| AC010468.1, AC010468.3 | Periodontitis (PAL4Q3) |
| THSD4 | Periodontitis (PAL4Q3) |
| ROBO2 | Periodontitis (PAL4Q3) |
| LINC01748, LINC02778 | Periodontitis (PAL4Q3) |
| DEFA10P, DEFA9P | Periodontitis (PAL4Q3) |
| NKAIN3 | Periodontitis (PAL4Q3) |
| PPIAP65, LINC01854 | Periodontitis (PAL4Q3) |
| IGLV10-54 | Periodontitis (PAL4Q3) |
| ROCK1P1 | Periodontitis (Mean PAL) |
| AC055874.1 | Periodontitis (Mean PAL) |
| SMURF2 | Periodontitis (Mean PAL) |
| AC027229.1, RN7SL97P | Periodontitis (Mean PAL) |
| AC015871.1, ST20-MTHFS | Periodontitis (Mean PAL) |
| THSD4 | Periodontitis (Mean PAL) |
| ZNF579 | Periodontitis (Mean PAL) |
| ABCA1 | Periodontitis (Mean PAL) |
| MIR8052, BAK1P2 | Periodontitis (Mean PAL) |
| BCORL1, AL034405.1 | Periodontitis (Mean PAL) |
| BIRC5 | Periodontitis (Mean PAL) |
| AC063949.1, C12orf74 | Periodontitis (Mean PAL) |
| ST20-AS1, AC015871.2 | Periodontitis (Mean PAL) |
| CDH13, AC009063.2 | Periodontitis (Mean PAL) |
| AC114324.2, LINC02062 | Periodontitis (Mean PAL) |
| ICE2P2, NDUFA5P5 | Periodontitis (Mean PAL) |
| AP001042.1 | Periodontitis (Mean PAL) |
| AC093534.2, RPL35AP15 | Periodontitis (DPAL) |
| DAOA-AS1, AL138954.1 | Periodontitis (DPAL) |
| GRIK1 | Periodontitis (DPAL) |
| AC093534.2, RPL35AP15 | Periodontitis (DPAL) |
| NLGN1 | Periodontitis (DPAL) |
| AC006059.2, CCDC13 | Periodontitis (DPAL) |
| PWRN1, AC090983.2 | Periodontitis (DPAL) |
| SUMF1 | Periodontitis (DPAL) |
| LBP | Periodontitis (DPAL) |
| LINC02022 | Periodontitis (DPAL) |
| AC005208.1, KCNJ16 | Periodontitis (DPAL) |
| SCN2A | Periodontitis (DPAL) |
| TGIF1 | Periodontitis (DPAL) |
| NPAP1, AC090983.2, PWRN1 | Periodontitis (DPAL) |
| ZFPM2 | Periodontitis (DPAL) |
| PPIAP65, LINC01854 | Periodontitis (PAL4Q3) |
| LINC00907 | Periodontitis (PAL4Q3) |
| RBFOX1 | Periodontitis (PAL4Q3) |
| LINC01933 | Periodontitis (PAL4Q3) |
| HMGB1P5, AC092421.1 | Periodontitis (PAL4Q3) |
| DEFA10P, DEFA9P | Periodontitis (PAL4Q3) |
| LINC00907 | Periodontitis (PAL4Q3) |
| THSD4 | Periodontitis (PAL4Q3) |
| FAM135B | Periodontitis (PAL4Q3) |
| AC010468.1, CAMK4 | Periodontitis (PAL4Q3) |
| FAM126A | Periodontitis (Mean PAL) |
| NKAIN2 | Periodontitis (Mean PAL) |
| PSMA8 | Periodontitis (Mean PAL) |
| ERC2 | Periodontitis (Mean PAL) |
| MIR8052, BAK1P2 | Periodontitis (Mean PAL) |
| ACTN1 | Periodontitis (Mean PAL) |
| DKK1, RPL31P44 | Periodontitis (Mean PAL) |
| AL591501.1 | Periodontitis (Mean PAL) |
| FIZ1 | Periodontitis (Mean PAL) |
| HMX3, ACADSB | Periodontitis (Mean PAL) |
| HS6ST2 | Periodontitis (Mean PAL) |
| LINC01278 | Periodontitis (Mean PAL) |
| AC090666.1, LINC01919 | Periodontitis (Mean PAL) |
| NKAIN2 | Periodontitis (Mean PAL) |
| HNRNPA1P58, NRSN1 | Periodontitis (Mean PAL) |
| AC123023.1, LINC01811 | Periodontitis (Mean PAL) |
| GDF15 | Periodontitis (Mean PAL) |
| NPM1P2 | Periodontitis (Mean PAL) |
| AC063965.1, PTEN | Periodontitis (Mean PAL) |
| PTPRT | Periodontitis (Mean PAL) |
| CSMD1 | Periodontitis (CDC/AAP) |
| RGMA, AC108457.1 | Periodontitis (CDC/AAP) |
| AC022239.2, LINC00208 | Periodontitis (CDC/AAP) |
| AC022239.2, LINC00208 | Periodontitis (CDC/AAP) |
| KDM4B | Periodontitis (CDC/AAP) |
| AC090365.1, CDH2 | Periodontal disease-related phenotype (Socransky) |
| FHOD3 | Periodontal disease-related phenotype (Socransky) |
| LINC02855, HAS2-AS1 | Periodontal disease-related phenotype (Socransky) |
| HSP90AB2P, U6 | Periodontal disease-related phenotype (Socransky) |
| GVINP1 | Periodontal disease-related phenotype (Socransky) |
| AL356124.1 | Periodontal disease-related phenotype (Socransky) |
| HSP90AB2P, U6 | Periodontal disease-related phenotype (Socransky) |
| OSBPL10 | Periodontal disease-related phenotype (Socransky) |
| AL355838.1 | Periodontal disease-related phenotype (Socransky) |
| CDKL1 | Periodontal disease-related phenotype (Socransky) |
| CRACR2A | Chronic periodontitis (localised) |
| KCNQ5 | Periodontitis |
| GPR141, EPDR1 | Periodontitis |
| C5AR1 | Chronic periodontitis |
| DLG2 | Chronic periodontitis |
| SIGLEC5, AC018755.2 | Periodontitis |
| AP000959.1, MAPK6P2 | Periodontitis |
| RNU6-675P, TEX51 | Periodontitis |
| MIR297, LYPLA1P2 | Periodontitis |
| AL109933.3 | Periodontitis |
| LINC01239, AL391117.1 | Periodontitis |
| AL354916.1, CUX2P1 | Periodontitis |
| NUDT5 | Periodontitis |
| AC004241.1 | Periodontitis |
| HUNK | Periodontitis |

Appendix S2. Genes and their corresponding proteins for Parkinson’s Disease

| **Mapped gene** | **Reported trait** |
| --- | --- |
| SIRLNT, AC022733.2 | Parkinson's disease (motor and cognition) |
| LMNB1, MARCH3 | Parkinson's disease (motor and cognition) |
| CLRN3 | Parkinson's disease (motor and cognition) |
| ODAPH | Parkinson's disease (motor and cognition) |
| CTC1 | Parkinson's disease (motor and cognition) |
| PLPPR1 | Parkinson's disease (age at diagnosis) |
| AC093866.1 | Parkinson's disease |
| LINC02210-CRHR1, LINC02210 | Parkinson's disease |
| HLA-DQA1, HLA-DRB1 | Parkinson's disease |
| RN7SL813P, STK39 | Parkinson's disease |
| GAK | Parkinson's disease |
| GCH1 | Parkinson's disease |
| MCCC1, DCUN1D1 | Parkinson's disease |
| KLHL7-DT, FAM126A | Parkinson's disease |
| RAB29, NUCKS1 | Parkinson's disease |
| TIAL1, RAD1P1 | Parkinson's disease |
| FAM47E, FAM47E-STBD1, AC034139.1 | Parkinson's disease |
| BST1 | Parkinson's disease |
| RIT2 | Parkinson's disease |
| AL009179.1 | Parkinson's disease |
| CCDC62 | Parkinson's disease |
| OR5AZ1P, OR5BD1P | Parkinson's disease |
| LINC02451 | Parkinson's disease |
| SH3GL2 | Parkinson's disease |
| SYT17 | Parkinson's disease |
| NDUFAF2 | Parkinson's disease |
| CA8 | Parkinson's disease |
| AC067852.1 | Parkinson's disease |
| LRRK2 | Parkinson's disease |
| AC087311.2, SYT10 | Parkinson's disease |
| GBA | Parkinson's disease |
| TMEM175 | Parkinson's disease |
| BST1 | Parkinson's disease |
| LRRK2 | Parkinson's disease |
| LAMTOR2, RAB25 | Parkinson's disease |
| CCNT2-AS1 | Parkinson's disease |
| MCCC1 | Parkinson's disease |
| AC093866.1 | Parkinson's disease |
| RN7SL813P, STK39 | Parkinson's disease |
| CCDC62 | Parkinson's disease |
| AC093866.1 | Parkinson's disease |
| GAK | Parkinson's disease |
| NSF | Parkinson's disease |
| SEMA5A | Parkinson's disease |
| TMEM72-AS1, AL356157.1 | Parkinson's disease |
| STAP1 | Parkinson's disease |
| DLG2 | Parkinson's disease |
| AC093866.1 | Parkinson's disease |
| BST1 | Parkinson's disease |
| SLC2A13 | Parkinson's disease |
| AC119673.1 | Parkinson's disease |
| GAK | Parkinson's disease (familial) |
| PLEKHM1 | Parkinson's disease |
| TAS1R2, PAX7 | Parkinson's disease |
| BRINP1 | Parkinson's disease |
| DGKQ | Parkinson's disease |
| AC034213.1, GFPT2 | Parkinson's disease |
| SNCA | Parkinson's disease |
| FAM47E, FAM47E-STBD1, AC034139.1 | Parkinson's disease |
| AC093866.1 | Parkinson's disease |
| MAPT-AS1, SPPL2C | Parkinson's disease |
| MCCC1 | Parkinson's disease |
| TMEM175 | Parkinson's disease |
| RIT2 | Parkinson's disease |
| SREBF1 | Parkinson's disease |
| LRRK2 | Parkinson's disease |
| SLC41A1 | Parkinson's disease |
| AJ009632.2 | Parkinson's disease |
| NSF | Parkinson's disease |
| UNC13B | Parkinson's disease |
| WNT3 | Parkinson's disease |
| LINC01709, LINC01307 | Parkinson's disease |
| AC093866.1 | Parkinson's disease |
| AC093866.1 | Parkinson's disease |
| HLA-DRA | Parkinson's disease |
| HLA-DRA | Parkinson's disease |
| WNT3 | Parkinson's disease |
| WNT3 | Parkinson's disease |
| LINC01709, LINC01307 | Parkinson's disease |
| CCDC82 | Parkinson's disease |
| TMC3-AS1, TMC3 | Parkinson's disease |
| COL13A1 | Parkinson's disease |
| LINC00476 | Parkinson's disease (pesticide exposure interaction) |
| AC011586.2 | Parkinson's disease |
| SPTSSB | Parkinson's disease |
| DLG2 | Parkinson's disease |
| ZNF165, ZSCAN16-AS1 | Parkinson's disease |
| LRRK2, AC079630.1 | Parkinson's disease |
| CCDC62 | Parkinson's disease |
| GCH1 | Parkinson's disease |
| TMEM229B | Parkinson's disease |
| AC018618.1 | Parkinson's disease |
| BCKDK | Parkinson's disease |
| MAPT | Parkinson's disease |
| RIT2 | Parkinson's disease |
| TMPRSS9 | Parkinson's disease |
| LZTS3, DDRGK1 | Parkinson's disease |
| ITPKB | Parkinson's disease |
| MAP4K4 | Parkinson's disease |
| SCN2A | Parkinson's disease |
| TBC1D5 | Parkinson's disease |
| IP6K2 | Parkinson's disease |
| ITIH1 | Parkinson's disease |
| RNU1-138P, CAMK2D | Parkinson's disease |
| NDUFAF2 | Parkinson's disease |
| GPR89P, AL009179.1 | Parkinson's disease |
| CTSB | Parkinson's disease |
| HLA-DQB1, MTCO3P1 | Parkinson's disease |
| GPNMB | Parkinson's disease |
| AGAP1 | Parkinson's disease |
| INPP5F | Parkinson's disease |
| PAM | Parkinson's disease |
| AP001979.1, IGSF9B | Parkinson's disease |
| CCN6, LINC02527 | Parkinson's disease |
| AC103957.1, AC103957.2 | Parkinson's disease |
| GBF1 | Parkinson's disease |
| CAB39L | Parkinson's disease |
| AL359502.1, PSMA6P4 | Parkinson's disease |
| AL355773.1, KTN1 | Parkinson's disease |
| LTK | Parkinson's disease |
| ITGA2B | Parkinson's disease |
| Y_RNA, MED13 | Parkinson's disease |
| HMGN2P18, KRTCAP2 | Parkinson's disease |
| RAB29, NUCKS1 | Parkinson's disease |
| SIPA1L2 | Parkinson's disease |
| CCNT2-AS1 | Parkinson's disease |
| RN7SL813P, STK39 | Parkinson's disease |
| MCCC1 | Parkinson's disease |
| TMEM175 | Parkinson's disease |
| BST1 | Parkinson's disease |
| FAM47E, FAM47E-STBD1, AC034139.1 | Parkinson's disease |
| AC093866.1 | Parkinson's disease |
| BIN3 | Parkinson's disease |
| SH3GL2 | Parkinson's disease |
| ITGA8 | Parkinson's disease |
| GPR65 | Parkinson's disease |
| SYT17 | Parkinson's disease |
| CASC16 | Parkinson's disease |
| WNT9A, CICP26 | Parkinson's disease |
| COL5A2 | Parkinson's disease |
| AC126121.3 | Parkinson's disease |
| AC068633.1, IGSF11 | Parkinson's disease |
| LINC02224 | Parkinson's disease |
| AL513124.1, AL355674.1 | Parkinson's disease |
| RPA2P1, MDGA2 | Parkinson's disease |
| AC007998.4, AC007998.3 | Parkinson's disease |
| LHFPL2 | Parkinson's disease (familial, age at onset) |
| TRPS1 | Parkinson's disease (familial, age at onset) |
| KLHDC1 | Parkinson's disease (familial, age at onset) |
| TPM1 | Parkinson's disease (familial, age at onset) |
| LINC02210, LINC02210-CRHR1 | Parkinson's disease |
| AC093866.1 | Parkinson's disease |
| BST1 | Parkinson's disease |
| AC079385.1 | Parkinson's disease |
| HLA-DRA | Parkinson's disease |
| PRDM15 | Parkinson's disease |
| AC093866.1 | Parkinson's disease |
| RN7SL813P, STK39 | Parkinson's disease |
| BST1 | Parkinson's disease |
| AL357075.5, CNKSR3 | Parkinson's disease |
| TSBP1-AS1, HLA-DRA | Parkinson's disease |
| SLC50A1 | Parkinson's disease |
| CCNT2-AS1 | Parkinson's disease |
| DGKQ | Parkinson's disease |
| CTSB, FDFT1 | Parkinson's disease |
| SH3GL2 | Parkinson's disease |
| ANO5, AC116534.1 | Parkinson's disease |
| SLC2A13 | Parkinson's disease |
| AC018618.1 | Parkinson's disease |
| PRSS53, AC135050.2, ZNF646 | Parkinson's disease |
| WNT3 | Parkinson's disease |
| RIT2 | Parkinson's disease |
| DSG3 | Parkinson's disease (age of onset) |
| AC021979.2, OCA2 | Parkinson's disease (age of onset) |
| ATF6 | Parkinson's disease (age of onset) |
| QSER1, PRRG4 | Parkinson's disease (age of onset) |
| AAK1 | Parkinson's disease (age of onset) |
| CNTN1 | Parkinson's disease |
| KANSL1 | Parkinson's disease |
| KCNN3, PMVK | Parkinson's disease |
| RAB29, NUCKS1 | Parkinson's disease |
| MCCC1 | Parkinson's disease |
| AC093866.1 | Parkinson's disease |
| SLC2A13 | Parkinson's disease |
| DLG2 | Parkinson's disease |
| COL3A1, AC092598.1 | Parkinson disease and lewy body pathology |
| TCEANC2 | Parkinson disease and lewy body pathology |
| MX2 | Parkinson disease and lewy body pathology |
| ZP3 | Parkinson disease and lewy body pathology |
| PABPN1L, TRAPPC2L | Parkinson disease and lewy body pathology |
| KCNIP4 | Parkinson disease and lewy body pathology |
| FRG1CP, MIR663AHG | Parkinson disease and lewy body pathology |
| HTR2A-AS1, HTR2A | Parkinson disease and lewy body pathology |
| AC026826.3, AC023968.1 | Parkinson disease and lewy body pathology |
| AC079070.1, LINC02582 | Parkinson disease and lewy body pathology |
| ISM1, AL121782.1 | Parkinson's disease |
| FAM47E, FAM47E-STBD1, AC034139.1 | Parkinson's disease |
| ITGA8 | Parkinson's disease |
| SNCA | Parkinson's disease |
| NSF | Parkinson's disease |
| LINC02210-CRHR1, LINC02210 | Parkinson's disease |
| NUCKS1 | Parkinson's disease |
| CYP17A1, WBP1L | Parkinson's disease |
| MMRN1, SNCA-AS1 | Parkinson's disease |
| AL365295.1, LINC02331 | Parkinson's disease |
| PMVK | Parkinson's disease or first degree relation to individual with Parkinson's disease |
| FAM47E, SCARB2 | Parkinson's disease or first degree relation to individual with Parkinson's disease |
| GBA | Parkinson's disease or first degree relation to individual with Parkinson's disease |
| AC093866.1 | Parkinson's disease or first degree relation to individual with Parkinson's disease |
| Z98751.1, VAMP4 | Parkinson's disease or first degree relation to individual with Parkinson's disease |
| RNU1-138P, CAMK2D | Parkinson's disease or first degree relation to individual with Parkinson's disease |
| RAB29 | Parkinson's disease or first degree relation to individual with Parkinson's disease |
| ELOVL7 | Parkinson's disease or first degree relation to individual with Parkinson's disease |
| SIPA1L2 | Parkinson's disease or first degree relation to individual with Parkinson's disease |
| KCNS3 | Parkinson's disease or first degree relation to individual with Parkinson's disease |
| RSL24D1P1, AL009179.2 | Parkinson's disease or first degree relation to individual with Parkinson's disease |
| TRIM40 | Parkinson's disease or first degree relation to individual with Parkinson's disease |
| HLA-DRB1, HLA-DQA1 | Parkinson's disease or first degree relation to individual with Parkinson's disease |
| RNU4-66P, RIMS1 | Parkinson's disease or first degree relation to individual with Parkinson's disease |
| CCN6, LINC02527 | Parkinson's disease or first degree relation to individual with Parkinson's disease |
| AL137783.1, HMGB1P13 | Parkinson's disease or first degree relation to individual with Parkinson's disease |
| GPNMB | Parkinson's disease or first degree relation to individual with Parkinson's disease |
| AC006001.3, AC008267.3 | Parkinson's disease or first degree relation to individual with Parkinson's disease |
| CTSB | Parkinson's disease or first degree relation to individual with Parkinson's disease |
| AC011586.2 | Parkinson's disease or first degree relation to individual with Parkinson's disease |
| BIN3 | Parkinson's disease or first degree relation to individual with Parkinson's disease |
| FAM49B | Parkinson's disease or first degree relation to individual with Parkinson's disease |
| SH3GL2 | Parkinson's disease or first degree relation to individual with Parkinson's disease |
| SH3GL2 | Parkinson's disease or first degree relation to individual with Parkinson's disease |
| UBAP2 | Parkinson's disease or first degree relation to individual with Parkinson's disease |
| CHRNB1 | Parkinson's disease or first degree relation to individual with Parkinson's disease |
| RETREG3 | Parkinson's disease or first degree relation to individual with Parkinson's disease |
| UBTF | Parkinson's disease or first degree relation to individual with Parkinson's disease |
| FAM171A2 | Parkinson's disease or first degree relation to individual with Parkinson's disease |
| LINC02210-CRHR1 | Parkinson's disease or first degree relation to individual with Parkinson's disease |
| LINC02210-CRHR1 | Parkinson's disease or first degree relation to individual with Parkinson's disease |
| WNT3 | Parkinson's disease or first degree relation to individual with Parkinson's disease |
| BRIP1 | Parkinson's disease or first degree relation to individual with Parkinson's disease |
| DNAH17 | Parkinson's disease or first degree relation to individual with Parkinson's disease |
| ASXL3 | Parkinson's disease or first degree relation to individual with Parkinson's disease |
| RIT2 | Parkinson's disease or first degree relation to individual with Parkinson's disease |
| SRSF10P1, SMAD4 | Parkinson's disease or first degree relation to individual with Parkinson's disease |
| SPPL2B, AC005258.1 | Parkinson's disease or first degree relation to individual with Parkinson's disease |
| AL035461.3, CRLS1 | Parkinson's disease or first degree relation to individual with Parkinson's disease |
| DYRK1A | Parkinson's disease or first degree relation to individual with Parkinson's disease |
| AL135927.1, SEMA4A | Parkinson's disease or first degree relation to individual with Parkinson's disease |
| TMEM163 | Parkinson's disease or first degree relation to individual with Parkinson's disease |
| AC093866.1 | Parkinson's disease or first degree relation to individual with Parkinson's disease |
| SNCA | Parkinson's disease or first degree relation to individual with Parkinson's disease |
| ZNF608, AC113398.1 | Parkinson's disease or first degree relation to individual with Parkinson's disease |
| SLC44A4, EHMT2-AS1 | Parkinson's disease or first degree relation to individual with Parkinson's disease |
| DNM1L, FGD4 | Parkinson's disease or first degree relation to individual with Parkinson's disease |
| MUC19 | Parkinson's disease or first degree relation to individual with Parkinson's disease |
| MUC19 | Parkinson's disease or first degree relation to individual with Parkinson's disease |
| AC090630.1 | Parkinson's disease or first degree relation to individual with Parkinson's disease |
| SCARB2, AC110795.1 | Parkinson's disease or first degree relation to individual with Parkinson's disease |
| HMGN2P18, KRTCAP2 | Parkinson's disease or first degree relation to individual with Parkinson's disease |
| FAM47E-STBD1, AC034139.1, FAM47E | Parkinson's disease or first degree relation to individual with Parkinson's disease |
| AL592295.3, FCGR2A | Parkinson's disease or first degree relation to individual with Parkinson's disease |
| AC093866.1 | Parkinson's disease or first degree relation to individual with Parkinson's disease |
| RAB29, NUCKS1 | Parkinson's disease or first degree relation to individual with Parkinson's disease |
| CLCN3 | Parkinson's disease or first degree relation to individual with Parkinson's disease |
| ITPKB | Parkinson's disease or first degree relation to individual with Parkinson's disease |
| PAM | Parkinson's disease or first degree relation to individual with Parkinson's disease |
| AC006077.1 | Parkinson's disease or first degree relation to individual with Parkinson's disease |
| KCNIP3 | Parkinson's disease or first degree relation to individual with Parkinson's disease |
| MAP4K4 | Parkinson's disease or first degree relation to individual with Parkinson's disease |
| TMEM163 | Parkinson's disease or first degree relation to individual with Parkinson's disease |
| RN7SL813P, STK39 | Parkinson's disease or first degree relation to individual with Parkinson's disease |
| TBC1D5 | Parkinson's disease or first degree relation to individual with Parkinson's disease |
| RBMS3, AC098650.1 | Parkinson's disease or first degree relation to individual with Parkinson's disease |
| IP6K2 | Parkinson's disease or first degree relation to individual with Parkinson's disease |
| KPNA1 | Parkinson's disease or first degree relation to individual with Parkinson's disease |
| MED12L | Parkinson's disease or first degree relation to individual with Parkinson's disease |
| SPTSSB | Parkinson's disease or first degree relation to individual with Parkinson's disease |
| MCCC1 | Parkinson's disease or first degree relation to individual with Parkinson's disease |
| GAK | Parkinson's disease or first degree relation to individual with Parkinson's disease |
| TMEM175 | Parkinson's disease or first degree relation to individual with Parkinson's disease |
| BST1 | Parkinson's disease or first degree relation to individual with Parkinson's disease |
| LCORL | Parkinson's disease or first degree relation to individual with Parkinson's disease |
| ITGA8 | Parkinson's disease or first degree relation to individual with Parkinson's disease |
| GBF1 | Parkinson's disease or first degree relation to individual with Parkinson's disease |
| BAG3 | Parkinson's disease or first degree relation to individual with Parkinson's disease |
| INPP5F | Parkinson's disease or first degree relation to individual with Parkinson's disease |
| RNF141 | Parkinson's disease or first degree relation to individual with Parkinson's disease |
| DLG2 | Parkinson's disease or first degree relation to individual with Parkinson's disease |
| IGSF9B | Parkinson's disease or first degree relation to individual with Parkinson's disease |
| LRRK2, AC079630.1 | Parkinson's disease or first degree relation to individual with Parkinson's disease |
| LRRK2 | Parkinson's disease or first degree relation to individual with Parkinson's disease |
| AC084878.1, SLC38A1 | Parkinson's disease or first degree relation to individual with Parkinson's disease |
| HIP1R | Parkinson's disease or first degree relation to individual with Parkinson's disease |
| FBRSL1, AC079031.2 | Parkinson's disease or first degree relation to individual with Parkinson's disease |
| CAB39L | Parkinson's disease or first degree relation to individual with Parkinson's disease |
| LINC00456, MBNL2 | Parkinson's disease or first degree relation to individual with Parkinson's disease |
| MIPOL1 | Parkinson's disease or first degree relation to individual with Parkinson's disease |
| GCH1 | Parkinson's disease or first degree relation to individual with Parkinson's disease |
| RPS6KL1 | Parkinson's disease or first degree relation to individual with Parkinson's disease |
| RNU6-835P, GPR65 | Parkinson's disease or first degree relation to individual with Parkinson's disease |
| AC018618.1 | Parkinson's disease or first degree relation to individual with Parkinson's disease |
| SYT17 | Parkinson's disease or first degree relation to individual with Parkinson's disease |
| RABEP2, CD19 | Parkinson's disease or first degree relation to individual with Parkinson's disease |
| SETD1A | Parkinson's disease or first degree relation to individual with Parkinson's disease |
| NOD2 | Parkinson's disease or first degree relation to individual with Parkinson's disease |
| CASC16 | Parkinson's disease or first degree relation to individual with Parkinson's disease |
| PHBP21 | Parkinson's disease or first degree relation to individual with Parkinson's disease |
| GXYLT1 | Parkinson's disease or first degree relation to individual with Parkinson's disease |
| AC003070.7, AC003070.2 | Parkinson's disease or first degree relation to individual with Parkinson's disease |
| LINC02210-CRHR1 | Parkinson's disease or first degree relation to individual with Parkinson's disease |
| MAPT-AS1 | Parkinson's disease or first degree relation to individual with Parkinson's disease |
| KANSL1 | Parkinson's disease or first degree relation to individual with Parkinson's disease |
| NSF | Parkinson's disease or first degree relation to individual with Parkinson's disease |
| LZTS3, DDRGK1 | Parkinson's disease or first degree relation to individual with Parkinson's disease |
| AC093866.1 | Parkinson's disease in GBA mutation carriers |
| CTSB | Parkinson's disease in GBA mutation carriers |
| MAPT | Parkinson's disease |
| RBMS3, AC098650.1 | Parkinson's disease |
| AC093866.1 | Parkinson's disease |
| LRRK2 | Parkinson's disease |
| LRRK2 | Parkinson's disease |
| DGKQ | Parkinson's disease |
| AC093866.1 | Parkinson's disease |
| MMRN1, SNCA-AS1 | Parkinson's disease |
| SNCA | Parkinson's disease (age of onset) |
| SNCA-AS1 | Parkinson's disease (age of onset) |
| TMEM175 | Parkinson's disease (age of onset) |
| APOE | Parkinson's disease (age of onset) |
| GCH1 | Parkinson's disease |
| TMEM229B | Parkinson's disease |
| AC018618.1 | Parkinson's disease |
| BCKDK | Parkinson's disease |
| MAPT | Parkinson's disease |
| RIT2 | Parkinson's disease |
| TMPRSS9 | Parkinson's disease |
| LZTS3, DDRGK1 | Parkinson's disease |
| AC011586.2 | Parkinson's disease |
| HMGN2P18, KRTCAP2 | Parkinson's disease |
| RAB29, NUCKS1 | Parkinson's disease |
| SIPA1L2 | Parkinson's disease |
| CCNT2-AS1 | Parkinson's disease |
| RN7SL813P, STK39 | Parkinson's disease |
| MCCC1 | Parkinson's disease |
| TMEM175 | Parkinson's disease |
| BST1 | Parkinson's disease |
| FAM47E, FAM47E-STBD1, AC034139.1 | Parkinson's disease |
| AC093866.1 | Parkinson's disease |
| HLA-DQB1, MTCO3P1 | Parkinson's disease |
| GPNMB | Parkinson's disease |
| INPP5F | Parkinson's disease |
| DLG2 | Parkinson's disease |
| AP001979.1, IGSF9B | Parkinson's disease |
| LRRK2, AC079630.1 | Parkinson's disease |
| CCDC62 | Parkinson's disease |
| SNCA | Parkinson's disease (age of onset) |
| PRKN | Parkinson's disease (age of onset) |
| AC093866.1 | Parkinson's disease |
| LRRK2, MUC19 | Parkinson's disease |
| KANSL1 | Parkinson's disease |
| HLA-DQB1, MTCO3P1 | Parkinson's disease |
| LINC02210-CRHR1 | Parkinson's disease |
| TMEM175 | Parkinson's disease |
| SETD1A | Parkinson's disease |
| CHL1-AS1, CHL1 | Parkinsonism in frontotemporal lobe dementia |
| SP1 | Parkinsonism in frontotemporal lobe dementia |
| LINC01500 | Parkinsonism in frontotemporal lobe dementia |
